# Supplementary material
Source: PubMed Central journal article supplement (PMC3989672)
Supplement: embr0015-0411-sd2.pdf [file embr0015-0411-sd2.pdf]

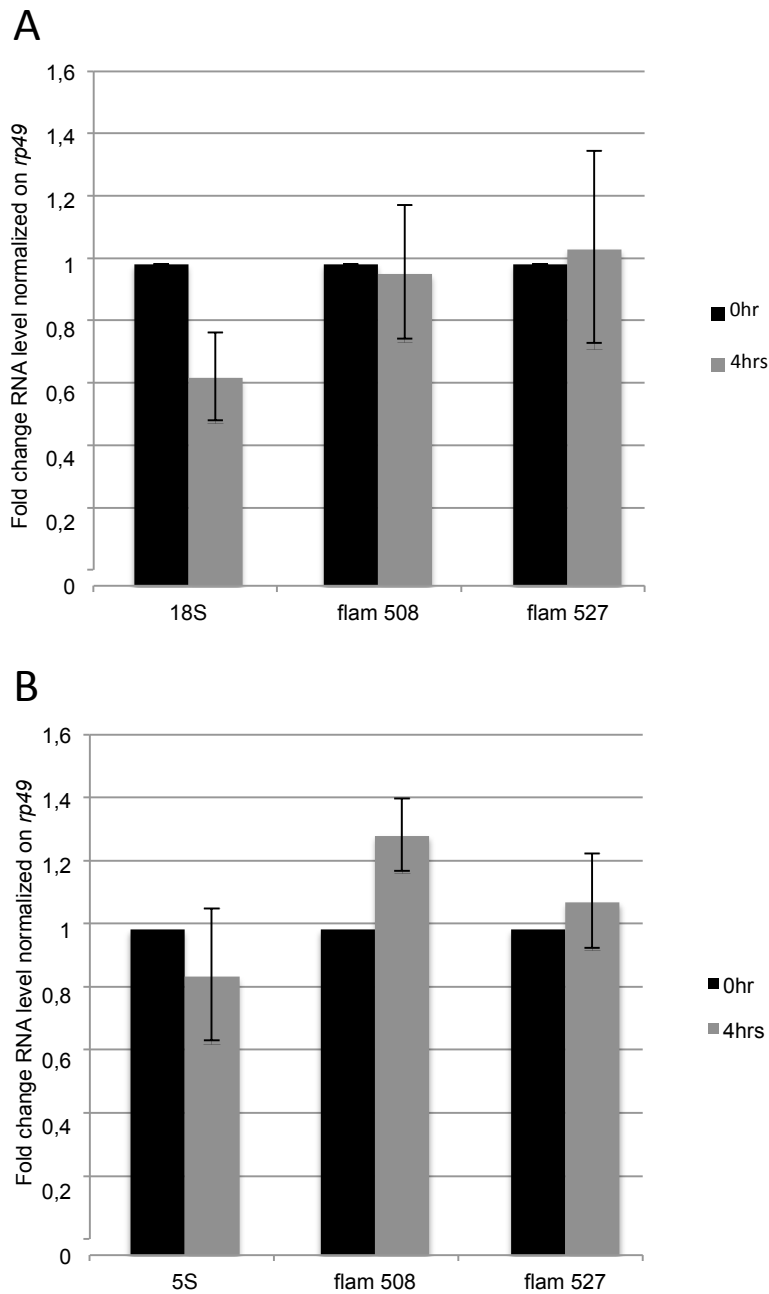

**Figure S1:** (A) RT-qPCR on total RNAs from OSS cells treated with Actinomycin D during 4 hours. 18S ribosomal RNA known to be transcribed by Pol I was used as positive control. Data are normalized to *rp49* expression and are presented as means (n=4). Error bars represent  $\pm$  s.e.m. Expression in untreated OSS cells (0hr) was set to one. (B) RT-qPCR on total RNAs from OSS cells treated with a Pol III inhibitor (ML-60218) during 4 hours. 5S ribosomal RNA known to be transcribed by Pol III was used as positive control. Data are normalized to *rp49* expression and are presented as means (n=3). Error bars represent  $\pm$  s.e.m. Expression in untreated OSS cells (0hr) was set to one.
