# Supplementary material
Source: PubMed Central journal article supplement (PMC3989672)
Supplement: embr0015-0411-sd3.pdf [file embr0015-0411-sd3.pdf]

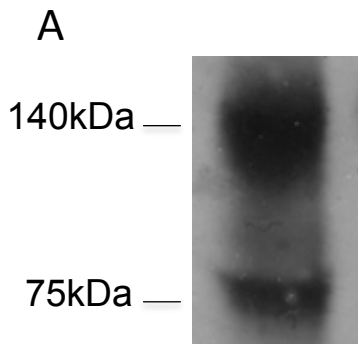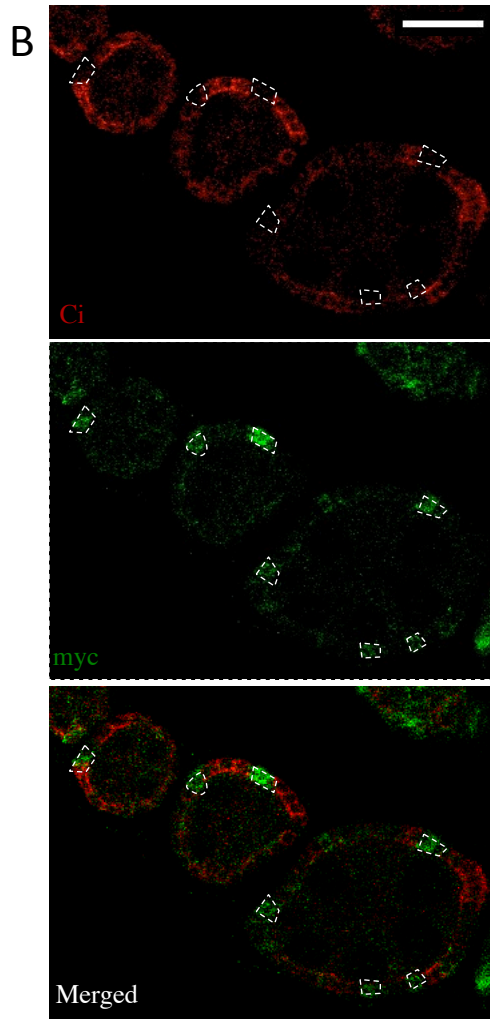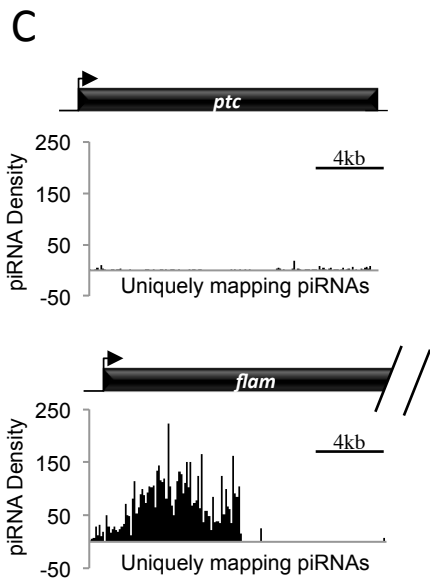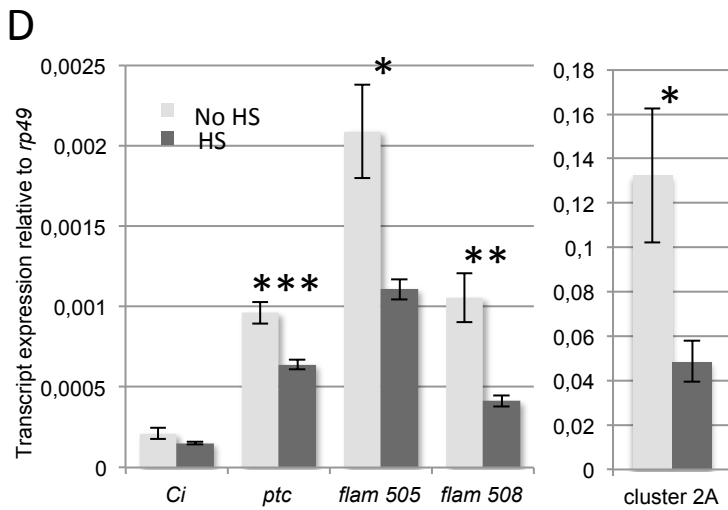

**Figure S2:** (A) Western Blot against Ci on OSS cells protein extraction. The two isoforms of Ci protein are detected in OSS cells. (B) Mutant clones for Ci. Ci (red) and Myc (green) immunostaining of ovarioles from *hs-flp; FRT42D P[Ci+] /FRT42D hs-MYC 45; Ci94/Ci94*. No Ci expression is detected in homozygote Myc cells visualized by a white dotted line. Scale bar, 20µm (C) piRNA profiles (genome unique; sense up, antisense down) from OSS cells mapping to the *ptc* gene (a gene known to be activated by Ci) and the piRNA cluster *flam*. (D) RT-qPCR on total RNAs from control ovaries (no HS) or from ovaries with a clonal population mutant for Ci (HS). The positions of primers used for PCR amplification are indicated in the Fig 4. *ptc* is a gene known to be activated by Ci in follicle cells. Data are presented as means (n>5). Error bars represent  $\pm$  s.e.m.; Student's *t*-test: \*=P<0,05; \*\*=P<0,01; \*\*\*=P<0,001.
