# Supplementary material
Source: PubMed Central journal article supplement (PMC3989672)
Supplement: embr0015-0411-sd4.pdf [file embr0015-0411-sd4.pdf]

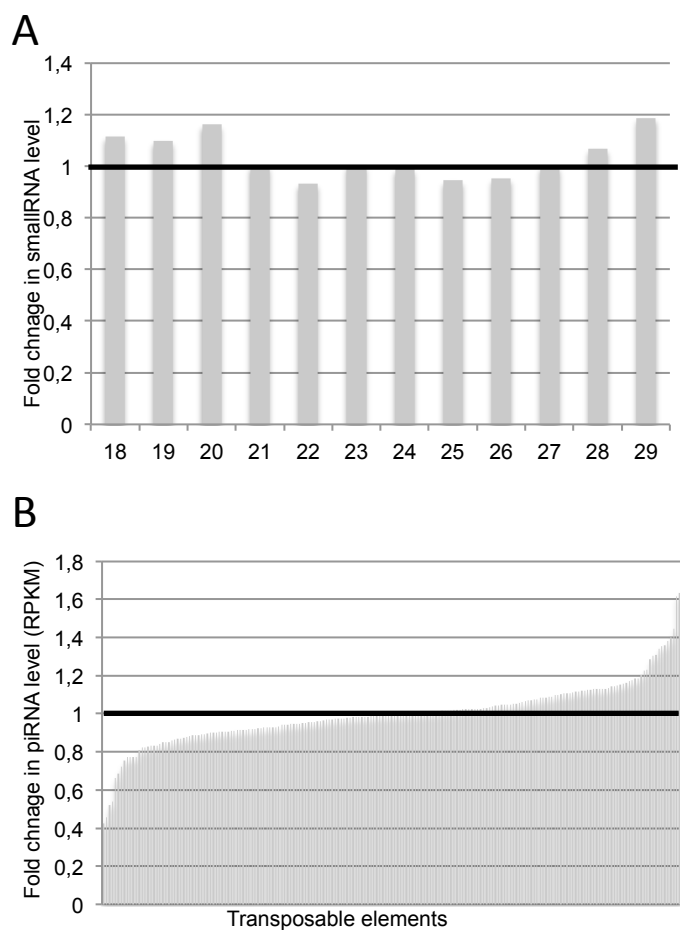

**Figure S3:** (A) Graph represents the fold change in length repartition of total small RNA sequenced from OSS cells transfected with siRNAs against Ci compared to OSS cells transfected with siRNAs against GFP, two days post-transfection. (B) Graph represents the fold change of transposable element piRNAs in OSS cells transfected with siRNAs against Ci and compared to OSS cells transfected with siRNAs against GFP. piRNAs are counted and normalised per RPKM on the 238 transposable elements indexed in repbase.
