# Supplementary material
Source: PubMed Central journal article supplement (PMC3989672)
Supplement: embr0015-0411-sd5.pdf [file embr0015-0411-sd5.pdf]

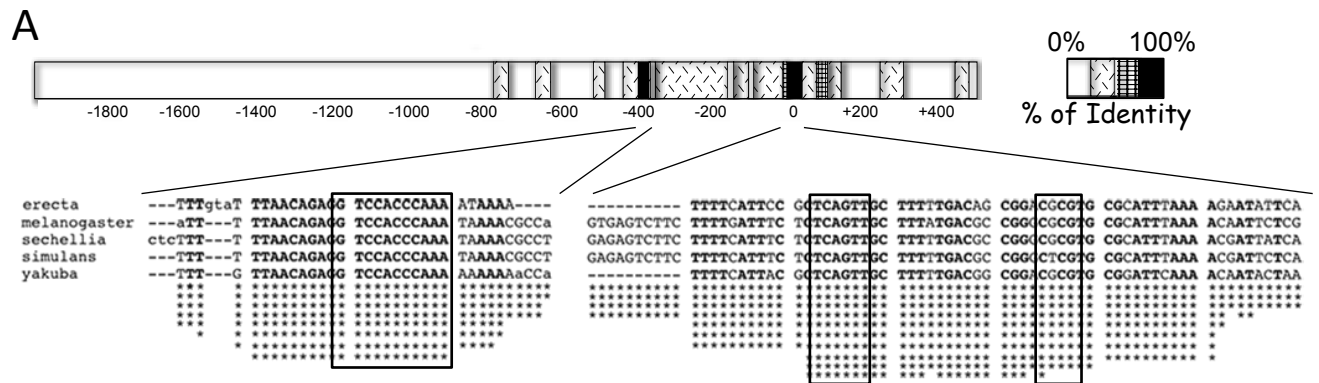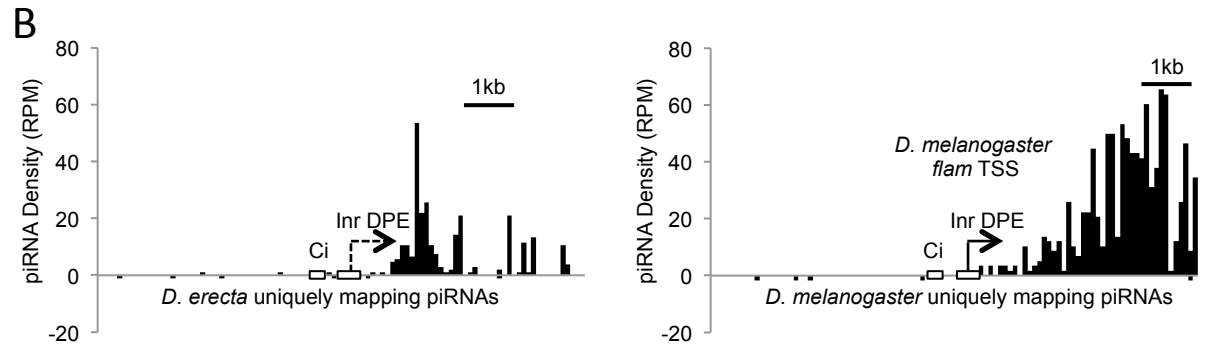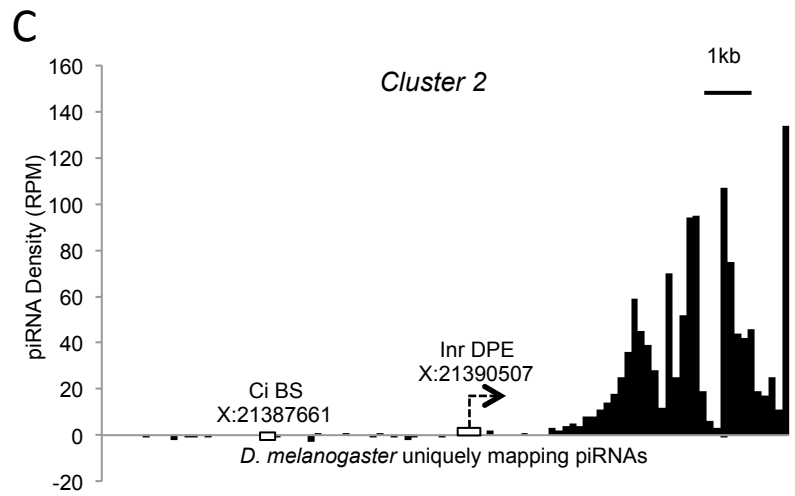

Supplementary Figure S4

**Figure S4:** (A) piRNA profiles (genome unique; sense up, antisense down) from OSS cells mapping to the beginning of piRNA cluster 2. Positions of the putative Inr-DPE sequences and the Ci binding site are indicated by rectangles. Dotted arrow indicated the putative cluster 2 promoter. (B) DNA sequence alignments of the *flam* promoter from different *Drosophila melanogaster* subgroup species from 2kb upstream to 500bp downstream of the TSS. The two more conserved regions are detailed below. The Ci binding site, Inr and DPE are indicated by rectangles. (C) Uniquely mapping *D. erecta* and *D. melanogaster* piRNAs are plotted over the putative *flam* cluster (normalized per million of reads) [29]. The Ci binding site and the Inr-DPE sequence are indicated. *D. melanogaster flam* TSS and the putative *D. erecta flam* promoter are represented by an arrow and dotted arrow respectively.
