# Supplementary material
Source: PubMed Central journal article supplement (PMC3989672)
Supplement: embr0015-0411-sd6.pdf [file embr0015-0411-sd6.pdf]

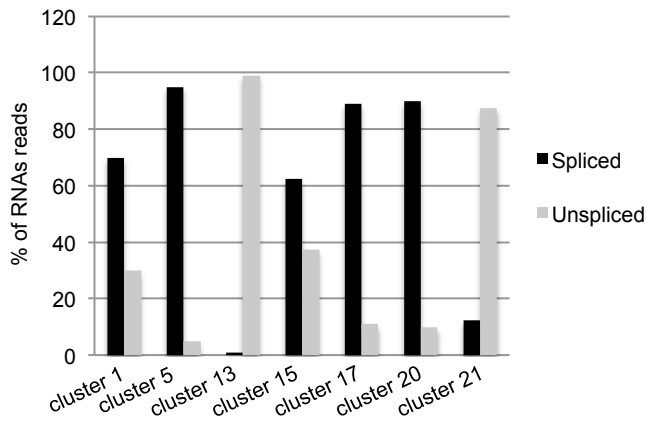

**Figure S5:** Reads encoded by several piRNA clusters reveal splicing events. Graphs represent the percentage of reads from [21] corresponding either to the predicted non-spliced Exon/Intron junction (grey) or to the predicted spliced Exon/Exon junction (black) from 7/21 piRNA clusters analyzed. Spliced reads have been visualised thanks to tophat.
