# Supplementary material
Source: PubMed Central journal article supplement (PMC3989672)
Supplement: embr0015-0411-sd7.pdf [file embr0015-0411-sd7.pdf]

| TSS | position | Ovaries     |             | OSS cells   |             |
|-----|----------|-------------|-------------|-------------|-------------|
|     |          | Extraction1 | Extraction2 | Extraction1 | Extraction2 |
| 1   | 21502904 |             |             | X           |             |
| 2   | 21502915 |             | X           |             |             |
| 3   | 21502918 | X           | X           | X           | XX          |
| 4   | 21502983 |             |             | X           |             |
| 5   | 21503199 |             | X           |             |             |
| 6   | 21504137 |             | X           |             |             |
| 7   | 21504639 | X           |             |             |             |
| 8   | 21506316 | X           |             |             |             |
| 9   | 21506855 | X           |             |             |             |
| 10  | 21507493 | X           |             |             |             |
| 11  | 21507571 | X           |             |             |             |

Table S1: RNA extractions in which the different TSSs were found.
