# Supplementary material
Source: PubMed Central journal article supplement (PMC3989672)
Supplement: embr0015-0411-sd8.pdf [file embr0015-0411-sd8.pdf]

| species             | flam's TSS position   |
|---------------------|-----------------------|
| <i>melanogaster</i> | X:21502918            |
| <i>simulans</i>     | X:16575589            |
| <i>sechellia</i>    | Scaffold423:1584      |
| <i>yakuba</i>       | X:20625060            |
| <i>erecta</i>       | Scaffold4690:17965703 |

Table S2: Best putative *flam* TSS position in *Drosophila melanogaster* subgroup species.
