# Supplementary material
Source: PubMed Central journal article supplement (PMC3989672)
Supplement: embr0015-0411-sd9.pdf [file embr0015-0411-sd9.pdf]

|                    | length | Donor site |                    | Acceptor site      |            |
|--------------------|--------|------------|--------------------|--------------------|------------|
| 21506829..21507115 | 286    | tgaacttacg | <u>GT</u> aatatcc  | tg <u>ttttc</u> AG | attcagatt  |
| 21503350..21504064 | 714    | tttcaagcg  | <u>GT</u> aagtgtt  | cac <u>tttt</u> AG | atattagctt |
| 21504108..21504985 | 877    | tacaattgtg | <u>GT</u> acgtgatt | tt <u>ttttc</u> AG | agcattggac |
| 21503350..21504985 | 1635   | tttcaagcg  | <u>GT</u> aagtgtta | tt <u>ttttc</u> AG | agcattggac |
| 21505027..21506774 | 1747   | ccggtttgct | Gcaagtattt         | ttat <u>ttt</u> AG | ctccttttt  |
| 21505134..21507115 | 1981   | accagccaag | <u>GT</u> atttaata | tg <u>ttttc</u> AG | attcagatt  |
| 21505134..21508851 | 3715   | accagccaag | <u>GT</u> atttaata | tatctgatAG         | tcggggaact |
| 21503350..21507132 | 3782   | tttcaagcg  | <u>GT</u> aagtgtt  | attaccattt         | ggctatgagg |
| 21505134..21540689 | 35555  | accagccaag | <u>GT</u> atttaata | tgattaaat          | tatcatgctc |
| 21505089..21540689 | 35600  | cgtgttttt  | tttgcgct           | gatttaaatt         | atcatgctc  |
| 21505134..21594560 | 89423  | accagccaag | <u>GT</u> atttaata | ttccatcAG          | tgccccgtct |
| 21503500..21661658 | 158158 | tectectact | <u>GT</u> ttggaat  | cgccggegct         | gctccgggtg |

Table S3: Sequence upstream and downstream of the donor and acceptor sites of *flam* introns.

Grey represents intron. Consensus sites are written in capital letters and underlined.
