# Supplementary material
Source: PubMed Central journal article supplement (PMC3989672)
Supplement: embr0015-0411-sd10.pdf [file embr0015-0411-sd10.pdf]

| Exon | position           | length |
|------|--------------------|--------|
| 1    | 21504986..X        |        |
| 2    | 21507116..X        |        |
| 3    | 21508851..X        |        |
| 4    | 21540689..X        |        |
| 5    | 21594560..X        |        |
| 6    | 21507132..X        |        |
| 7    | 21507116..X        |        |
| 8    | 21504986..21505026 | 40     |
| 9    | 21504065..21504107 | 42     |
| 10   | 21506775..21506828 | 53     |
| 11   | 21504986..21505088 | 102    |
| 12   | 21504986..21505133 | 147    |
| 13   | 21502918..21503349 | 431    |
| 14   | 21502918..21503500 | 582    |

Table S4: Coordinates and length of different exons find in *flam*. X represented undefined end.
