# Supplementary material
Source: PubMed Central journal article supplement (PMC3989672)
Supplement: embr0015-0411-sd11.pdf [file embr0015-0411-sd11.pdf]

| Experiment        | Primer Name            | Primer sequence              |
|-------------------|------------------------|------------------------------|
| q-PCR and RT-qPCR | Dip1 499 F             | TCGTCCGACCAGCAGAAT           |
|                   | Dip1 499 R             | TCCTCTATATTGTCGACGGA         |
|                   | flam 502 F             | CGAAAACAAATCAGGATCAAA        |
|                   | flam 502 R             | AAAACCTTTTGCAGCAGTATTAGGT    |
|                   | flam 503 F             | CGCATTAAAACAATTCTCG          |
|                   | flam 503 R             | TTTCGTTGTTGTTTCGCTTAG        |
|                   | flam 505 F             | TTATTTCTATGCCGGTTTGC         |
|                   | flam 505 R             | GTTTCGCTTGAAAGCTAGGAA        |
|                   | flam 507 F             | TTGGCTATGAGGATCAGACA         |
|                   | flam 507 R             | CTTCAAAGCGATTCAATCCT         |
|                   | flam 527 F             | GTGGCTTCACAAAACACGAC         |
|                   | flam 527 R             | GCCGGTCCTAAATATCTTCTC        |
|                   | flam 508 F             | ATTCTCCTTTCTCAGGATGC         |
|                   | flam 508 R             | GCATTGCTACCTTACGTTTC         |
|                   | flam 633 F             | ATGTAACAGGTATAGATGTAGTA<br>T |
|                   | flam 633 R             | CACATAGTCTTAAGCACGCCT        |
|                   | Ci R                   | TCTCATTACTGTGTGTTTCGATTT     |
|                   | Ci F                   | GCAGTATATGCTTGTTGTGCAT       |
|                   | Ptc R                  | GAGGGAAGCCAGCTGTTG           |
|                   | Ptc F                  | CATCACAGAGGCGGGATT           |
|                   | Cluster2A F            | GCCTACGCAGAGGCCTAAGT         |
|                   | Cluster2A R            | CAGATGTGGTCCAGTTGTGC         |
|                   | Cluster2B F            | CTGCTTTGTGCTTGGAGATG         |
|                   | Cluster2B R            | TCTGCACAGATTCTGAAATTGAA      |
|                   | Actine F               | AAGTTGCTGCTCTGGTTGTGC        |
|                   | Actine R               | GCCACACGCAGCTCATTGTAG        |
|                   | Blood F                | GACTTACATGGCATGGATTGA        |
|                   | Blood R                | GAATTCTTAAATCAAATCGGCAG      |
|                   | Gypsy F                | AGTTGTGTATCTGGCCACGT         |
|                   | Gypsy R                | CTTTGCCGAAAATATGCAATGT       |
|                   | Idefix F               | TCCAGACCAACCAAAGAAGC         |
|                   | Idefix R               | TCCATTGTTCTGTTTGAA           |
|                   | Mdgl F                 | ATATGAATTCCATATCGTACCTG      |
|                   | Mdgl R                 | CCTCAAAGTGAACCAATCTTC        |
|                   | Pifo F                 | GCATTCAACGCCAATAACCT         |
|                   | Pifo R                 | TTGTCTCAACTCCGTTGTGC         |
| Roo F             | CGTCTGCAATGTAAGGCTCT   |                              |
| Roo R             | TTCTTCACTTTCGGACTGAATG |                              |
| Tabor R           | ACGTTGTTACGACATTAGCCG  |                              |
| Tabor F           | GGGTTGGTTCGGATCTGACG   |                              |

| Experiment            | Primer Name | Primer sequence             |
|-----------------------|-------------|-----------------------------|
| 5' - and 3' -<br>race | A           | ATCAAGGAGGAGCCGATCTC        |
|                       | B           | ATTTGTTAACCGGACTTTGC        |
|                       | C           | TCGTCGTGCATTTGCTGGAA        |
|                       | D           | ATGCAGCGCAGTTTGACACT        |
|                       | E           | TACTGCTGCTGAGCTGAT          |
|                       | F           | AAACACGACCGTTCGCTTGA        |
|                       | G           | CAAACAGCACTGCGAATCACCTTAA   |
|                       | H           | CAGAAAATTAAGCGGAAGCCCCAC    |
|                       | I           | CACCCAAGATTTTGTACATTTTCAAGC |
|                       | J           | AAGATTTTGTACATTTTCAAGCGAGCA |

Tables S5: Sequences of primers used in this study.
